# Supplementary material for: Hepatocyte specific expression of an oncogenic variant of β-catenin results in lethal metabolic dysfunction in mice
Source: PubMed Central journal article supplement (PMC5834276; doi:10.18632/oncotarget.24346), 2018-01-30
Supplement: oncotarget-09-11243-s001.pdf [file oncotarget-09-11243-s001.pdf]

## Hepatocyte specific expression of an oncogenic variant of $\beta$ -catenin results in lethal metabolic dysfunction in mice

### SUPPLEMENTARY MATERIALS

**Supplementary Table 1: Whole liver proteomics.** List of all proteins detected in whole liver proteomics of 3 *Ctnnb1*<sup>CA hep</sup> mice and 3 WT littermates. Proteins are sorted according their gene name in alphabetic order. See Supplementary\_Table\_1

**Supplementary Table 2: Significant deregulated proteins of metabolism.** List of proteins involved in metabolic pathways and energy homeostasis. Significantly up-regulated proteins are marked in pink, significantly down-regulated in green. Livers of three mice of each genotype were analyzed in proteomics. Obtained data were evaluated by *T*-test (difference of mean) and variance analysis within groups. Values of *p*-value < 0.05; 0.58 log<sub>2</sub> fold change in expression were considered significant. See Supplementary\_Table\_2

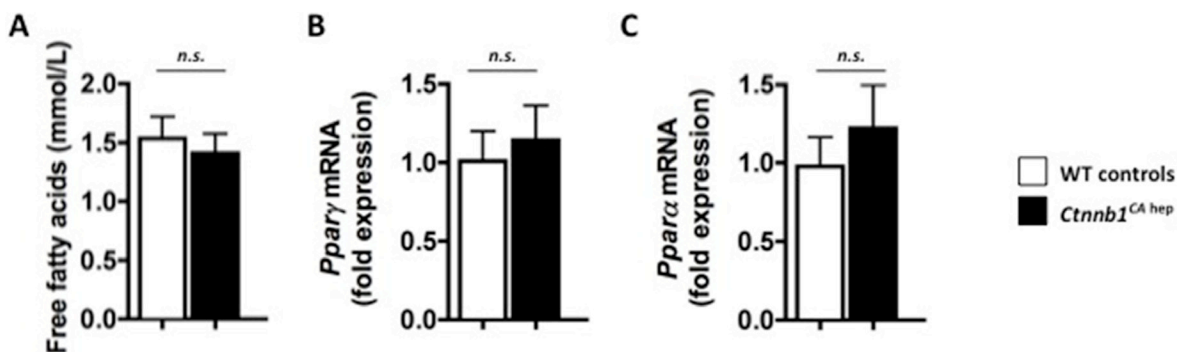

Supplementary Figure 1: mRNA data of key molecules in liver homeostasis, which were not significantly deregulated.
